# Supplementary material for: Site-specific phosphorylation of Fbxw7 by Cdk5/p25 and its resulting decreased stability are linked to glutamate-induced excitotoxicity
Source: PubMed Central journal article supplement (PMC6675790; doi:10.1038/s41419-019-1818-4), 2019-08-02
Supplement: 41419_2019_1818_MOESM1_ESM.pdf [file 41419_2019_1818_MOESM1_ESM.pdf]

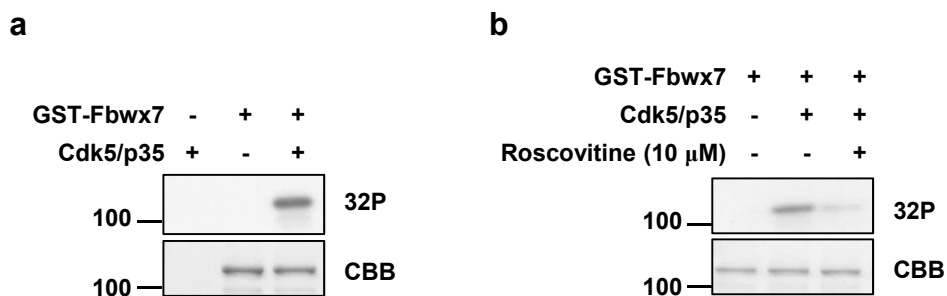

**Supplementary Figure 1. Cdk5/p35 phosphorylates Fbxw7.** (a) *In vitro* kinase assay for detecting phosphorylation of Fbxw7 by Cdk5/p35. Purified GST-Fbxw7 protein (1  $\mu$ g) was incubated with or without 0.1  $\mu$ g recombinant GST-Cdk5/GST-p25 protein in the presence of [ $\gamma$ - $^{32}$ P] ATP. (b) To inhibit Cdk5 kinase activity, samples were treated with 10  $\mu$ M roscovitine for 30 min before reaction. Reaction mixtures were resolved by SDS-PAGE and visualized by autoradiography. Coomassie brilliant blue (CBB) staining for GST-Fbxw7 protein was used as a loading control.

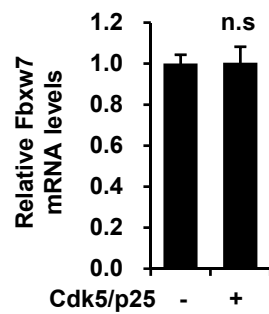

**Supplementary Figure 2. Overexpression of Cdk5/p25 dose not affect mRNA levels of Fbxw7.** HEK293T cells were transfected with vector containing the sequences with or without Cdk5/p25. Total RNA were extracted and subjected to qRT-PCR. Data were normalized to the internal control (GAPDH) and presented as a relative expression level over the control (value = 1). Bar represents the mean  $\pm$  SD from four independent experiments. n.s, not significant

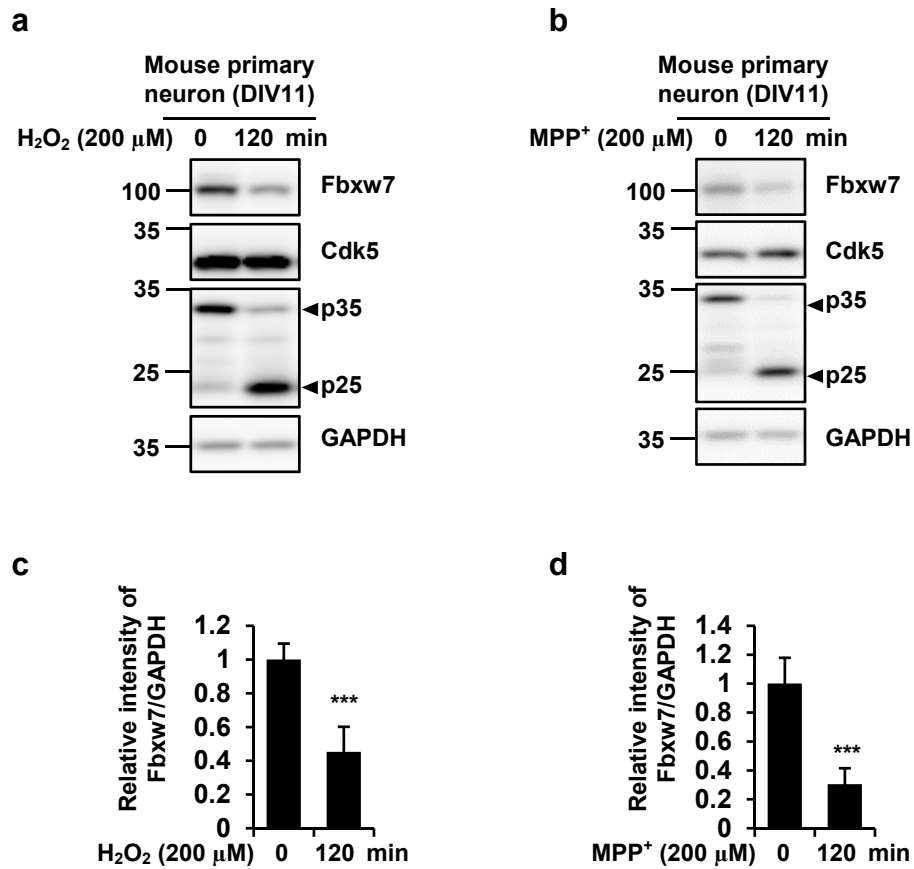

**Supplementary Figure 3. Decreased expression of Fbxw7 is detected in other pathological conditions.** At DIV11, primary cultures of cortical neurons were treated with **(a)** 200  $\mu M$  hydrogen peroxide ( $H_2O_2$ ) for 120 min and **(b)** 200  $\mu M$   $MPP^+$  iodide ( $MPP^+$ ) for 120 min, respectively. Cell lysates were harvested and analyzed by IB using the indicated antibodies. **(c, d)** Relative fold intensity of Fbxw7 was quantified over the non-treated control (value = 1). Bar represents the mean  $\pm$  SD from three independent experiments. \*\*\*  $p < 0.001$ .
